# Supplementary material
Source: publisher figshare collection journal article supplement (https://sage.figshare.com/ndownloader/files/16450352)
Supplement: Supplementary file 1 [file 16450352]

## Appendix A

### Signs of Neglect in Infants Assessment Scale, English version and Japanese version

乳児ネグレクトサインアセスメント尺度 日本語版

Please circle (○) the **number** that is closest to the actual situation or condition of the case.  
各項目について、事例の状況に最も近いと思う数字1つに○をつけてください。

| Situation<br>項目                         |                                                                                                                                  | Twice<br>or more<br>2 回以上<br>ある | Once<br>1 回ある | Never<br>全くない |
|-----------------------------------------|----------------------------------------------------------------------------------------------------------------------------------|---------------------------------|---------------|---------------|
| Lack of basic supervisory care 基本的世話の欠如 |                                                                                                                                  |                                 |               |               |
| 1                                       | Caregiver dresses the child in dirty clothes<br>養育者は子どもに汚れた衣服を着せている                                                              | 2                               | 1             | 0             |
| 2                                       | Caregiver gives the child inappropriate clothes for the season or weather<br>養育者は子どもに季節や天候に合わない服を着せている                           | 2                               | 1             | 0             |
| 3                                       | Caregiver does not bathe the child regularly<br>養育者は子どもを定期的に入浴させていない                                                             | 2                               | 1             | 0             |
| 4                                       | Caregiver does not keep the house clean, with trash remaining in the house and stains left uncleaned.<br>養育者は家の掃除をせずゴミや汚れを放置している | 2                               | 1             | 0             |
| 5                                       | Caregiver does not organize, leaving the house cluttered with many things<br>養育者は家の片付けをせず物が多く乱雑な状態にしている                          | 2                               | 1             | 0             |
| 6                                       | Caregiver places dangerous objects within the child's reach<br>養育者は危険な物を子どもの手の届く範囲に置いている                                         | 2                               | 1             | 0             |
| Child underdevelopment 子どもの身体的発育不良      |                                                                                                                                  |                                 |               |               |
| 7                                       | Child shows signs of poor weight gain<br>子どもに体重増加不良の徴候がある                                                                        | 2                               | 1             | 0             |
| 8                                       | Child shows signs of dehydration<br>子どもに脱水症状の徴候がある                                                                               | 2                               | 1             | 0             |
| 9                                       | Caregiver skips breast-feeding times required to meet the child's nutritional requirements<br>養育者は子どもへの授乳回数を必要量より少なくしている         | 2                               | 1             | 0             |
| 10                                      | Caregiver does not fulfill the child's nutritional requirements<br>養育者は子どもに必要な栄養を十分に与えていない                                       | 2                               | 1             | 0             |
| Lack of emotional behavior 情緒的養育行動の欠如   |                                                                                                                                  |                                 |               |               |
| 11                                      | Caregiver avoids eye contact with the child<br>養育者は子どもに対して視線を合わせようとしない                                                           | 2                               | 1             | 0             |
| 12                                      | Caregiver rarely speaks to or praises the child<br>養育者は子どもへの声かけやほめることが少ない                                                        | 2                               | 1             | 0             |
| 13                                      | Caregiver does not comfort the child when the child is crying<br>養育者は子どもが泣いてもあやそうとしない                                            | 2                               | 1             | 0             |
| 14                                      | Caregiver does not engage much in intimate connection with the child such as cuddling.<br>養育者は子どもを抱くなどの子どもへのかかわりが少ない             | 2                               | 1             | 0             |
| Total score<br>合計点                      |                                                                                                                                  |                                 |               |               |
